# Supplementary material for: Crosstalk between 5-Aminolevulinic Acid and Abscisic Acid Adjusted Leaf Iron Accumulation and Chlorophyll Synthesis to Enhance the Cold Tolerance in Solanum lycopersicum Seedlings
Source: MDPI journal article supplement (doi:10.3390/ijms241310781), 2023-06-28
Supplement: s1 [file s1]

## Supplementary data

**Table S1.** Primers for qRT-PCR.

| Gene            | Accession      | Gene annotation                                                                     | Forward primer          | Reverse primer            |
|-----------------|----------------|-------------------------------------------------------------------------------------|-------------------------|---------------------------|
| name            | numbers        |                                                                                     |                         |                           |
| <i>SLActin</i>  | Solyc11g065990 | actin                                                                               | GGGATGGAGAAGTTTGGTGGTGG | CTTCGACCAAGGGATGGTGTAGC   |
|                 |                | hydroxymethylbilane                                                                 |                         |                           |
| <i>SIPBGD</i>   | Solyc07g066470 | synthase /<br>uroporphyrinogen<br>synthetase<br>porphobilinogen                     | TTCTTCGCCTTGCCGTAAAT    | CTTCCTCGTGTTCCTCAACTCTGAT |
| <i>SIHEMB1</i>  | Solyc08g069030 | synthase /<br>delta-aminolevulinic<br>acid dehydratase<br>homocysteine              | CCTTTGCCCATAGCTGCCTA    | GCGATGTTTTCTCGCAGTGG      |
| <i>SIHEME1</i>  | Solyc10g007320 | methyltransferase<br>related                                                        | TGTGAAAAAGGGGAAAGTGGGT  | AAGGAGAGCAGAGGGAGTCT      |
| <i>SIHEMF1</i>  | Solyc10g005110 | coproporphyrinogen<br>oxidase                                                       | TACAGTTGGTGCAAAGGGGT    | TGTCACTGAACCACTAGCCA      |
| <i>SIZIP1</i>   | Solyc11g062020 | zinc-iron transporter<br>protein 1                                                  | GGCTCATAATGCTATAAACTCC  | GGCACTTGAAATGGGTG         |
| <i>SIZIP3</i>   | Solyc01g087530 | zinc-iron transporter<br>protein 3                                                  | GAGTCATCCTCCCAATC       | TGTATAAACCTGTGGC          |
| <i>SLAAO3</i>   | Solyc11g071580 | Aldehyde oxidase /<br>Retinal oxidase                                               | TCTGACTGGAGAGACTGCCA    | ACGACAAAGGGAAGAACCTGT     |
| <i>SINCED1</i>  | Solyc07g056570 | Beta-carotene<br>dioxygenase /<br>9-cis-epoxycarotenoid<br>dioxygenase <i>NCED3</i> | TGTTGCAAACGCCGTTTAG     | GCCGGTGGGTGTTACCTTTA      |
| <i>SICYP707</i> |                | abscisic acid                                                                       |                         |                           |
| <i>A1</i>       | Solyc04g078900 | 8'-hydroxylase / ABA<br>8'-hydroxylase                                              | TGGCAGTGGTGTACATGCTT    | CCAATGGGACTGGGAATGGT      |
| <i>SICYP707</i> |                | Abscisic acid                                                                       |                         |                           |
| <i>A2</i>       | Solyc08g005610 | 8'-hydroxylase<br>1-related                                                         | TCTCCCCGGTACACTCTTCA    | GAATGACCCGAGCAAATCGC      |

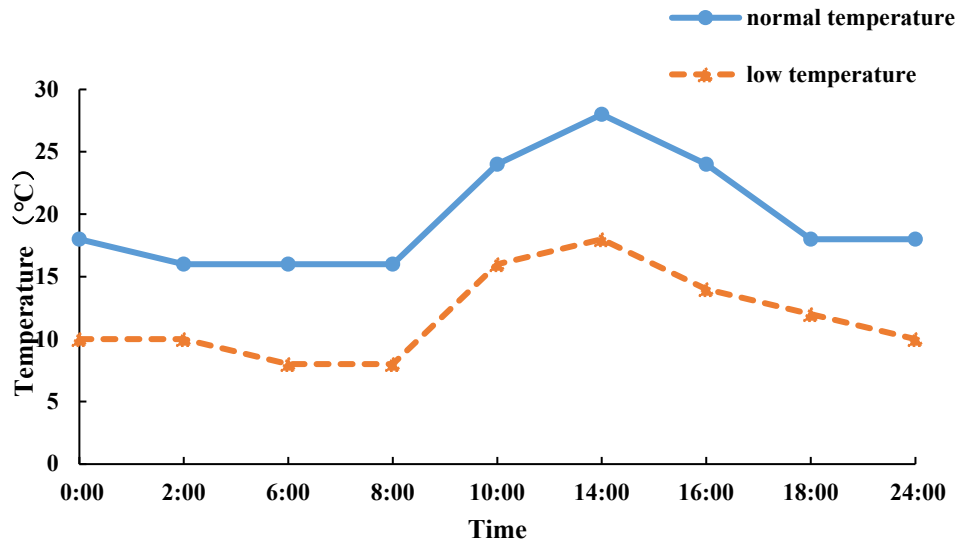

Figure S1. Temperature change in a day during the test.

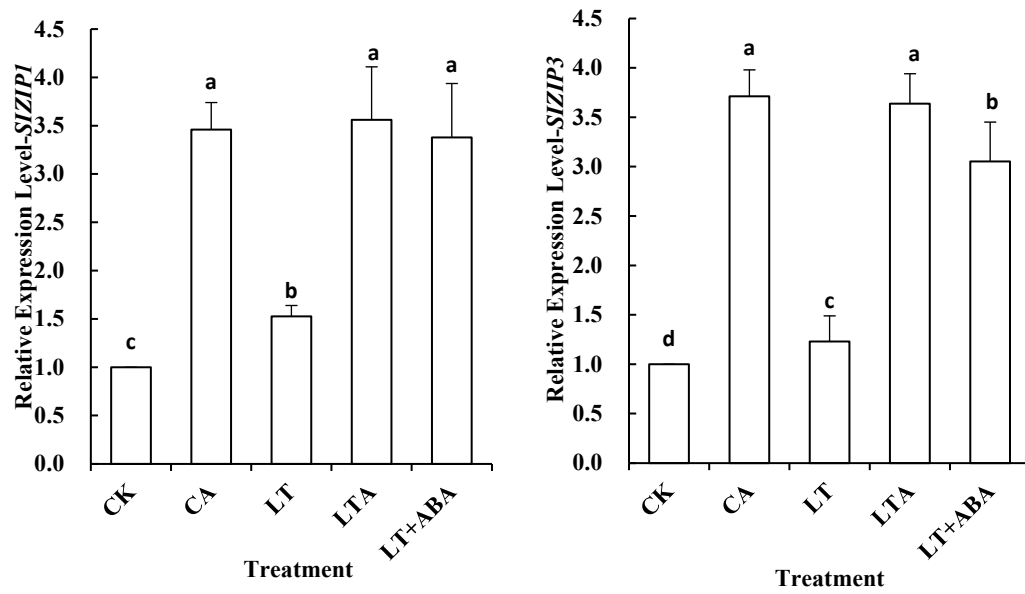

Figure S2. Effects of exogenous ALA and ABA on the expression levels of genes related to zinc-iron transporter.

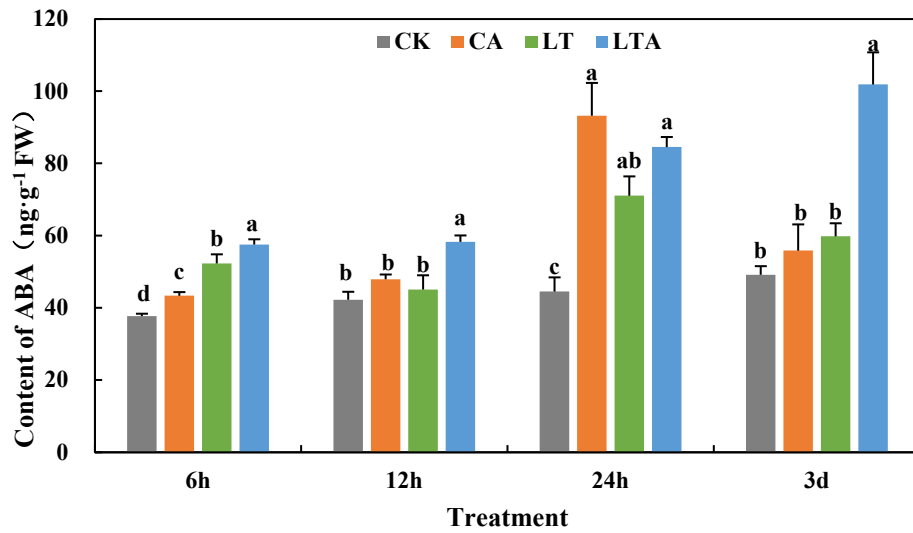

**Figure S3.** Effects of exogenous ALA on ABA content in tomato seedlings leaves.

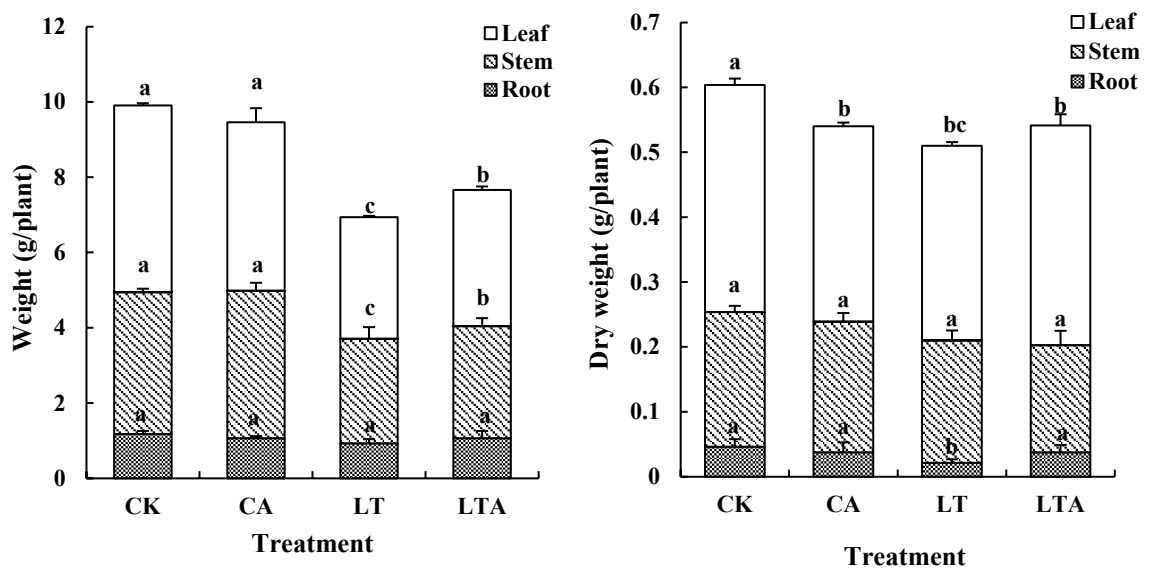

**Figure S4.** Effect of exogenous ALA on biomass accumulation of tomato seedlings.

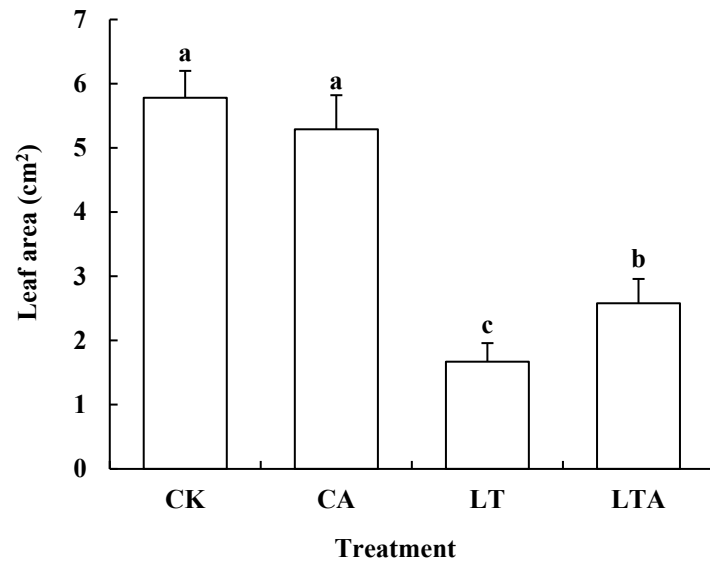

**Figure S5.** Effects of exogenous ALA on leaf area of tomato seedlings under low temperature stress.

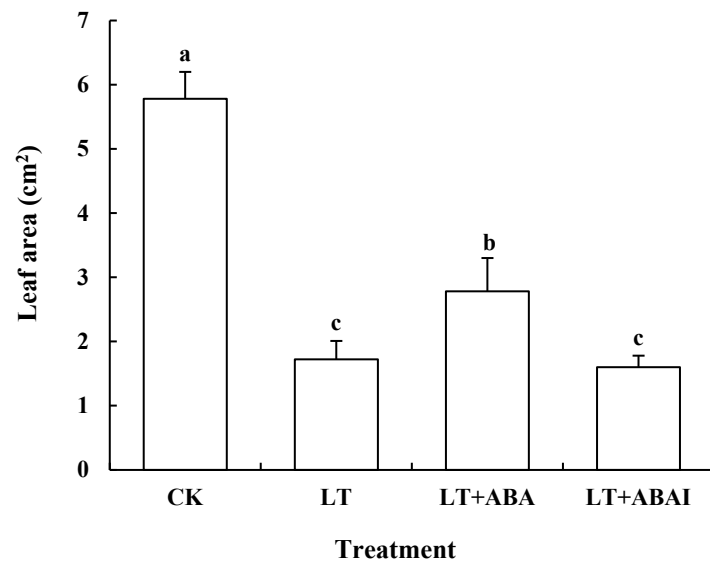

**Figure S6.** Effects of exogenous ABA on leaf area of tomato seedlings under low temperature stress.
